# Supplementary material for: Carbon emissions from land-use change and management in China between 1990 and 2010
Source: PubMed Central journal article supplement — Sci Adv. 2016 Nov 2;2(11):e1601063. doi: 10.1126/sciadv.1601063 (PMC5099982; doi:10.1126/sciadv.1601063), 2016-11-02
Supplement: 1601063_SM.pdf [file 1601063_SM.pdf]

## Supplementary Materials for **Carbon emissions from land-use change and management in China between 1990 and 2010**

Li Lai, Xianjin Huang, Hong Yang, Xiaowei Chuai, Mei Zhang, Taiyang Zhong, Zhigang Chen, Yi Chen,  
Xiao Wang, Julian R. Thompson

Published 2 November 2016, *Sci. Adv.* **2**, e1601063 (2016)  
DOI: 10.1126/sciadv.1601063

### **This PDF file includes:**

- Supplementary Materials and Methods
- table S1. Land-use categories.
- table S2. Biomass and SOC change due to land-use category change in China between 1990 and 2010.
- table S3. Repeated calculation for part of forest consumption.
- table S4. SOC impact factors for change in land-use conversion.
- table S5. SOC impact factors for Chinese farmland management.
- table S6. SOC impact factors for Chinese grassland management.
- table S7. Biomass carbon density of Chinese vegetation types.
- table S8. SOC density of Chinese soil types.
- table S9. Parameters for Chinese forest consumption.
- References (59–67)

## Supplementary Materials

### Supplementary Materials and Methods

#### Land-use category and area

This study employed a land-use dataset acquired from the National Resources and Environment Database of the Chinese Academy of Sciences (CAS). This dataset is based primarily on Landsat TM imagery from 1990, 1995, 2000, 2005 and 2010. The LUCC classification of CAS was adopted. This approach combines Landsat TM images and auxiliary data (i.e. temperature, precipitation, elevation) along with the calibration from field survey (59). The land-use types were classified into six categories: farmland, forest, grassland, water, built-up land and other land (table S1). A digital climate type map for use in this classification was made using the 1:3.6 million Chinese climate zoning map (60), divided into tropical, subtropical, temperate-wet, temperate-dry and plateau climatic zones.

#### Calculation of vegetation carbon storage change

The digital vegetation type map was made using the 1:1 million Chinese vegetation map (53), with vegetation classified according to 50 different classes. The values of carbon density for each vegetation types were collected from published results (table S7). Carbon emission from changes in above ground and below ground biomass caused by land-use change was calculated using the following formula

$$\Delta C_{CONVERSION} = \sum_i [(B_{AFTERi} - B_{BEFOREi}) \times \Delta A_{TO\_OTHERSi}]$$

where  $\Delta C_{CONVERSION}$  is the change in biomass carbon stocks on land converted to another land type;  $B_{AFTERi}$  is carbon stocks on land type  $i$  immediately after the conversion;  $B_{BEFOREi}$  is carbon stocks on land type  $i$  before the conversion;  $\Delta A_{TO\_OTHERSi}$  is the area of land-use  $i$  converted to another land type;  $i$  is type of land-use converted to another type.

#### Calculation of SOC storage change

The digital soil carbon map was made using the 1:1million Chinese soil type map (54) and SOC from China's 2<sup>nd</sup> National Soil Survey conducted from 1979–1985 (22, 55, 56). Due to data limitations, Taiwan was not included in this analysis. Comparing land-use category and area for each patch, we analyzed the soil carbon storage change caused by land-use conversion between 1990 and 2010. We used the Tier 1 method from IPCC (58). Different methods can be used to up-scale the SOC results. One study in Zhejiang Province, China found that the differences caused by four alternative methods (the mean, median, soil profile statistics and pedological professional knowledge) were in the range 0.5% - 10.6% (61). We used the soil profile statistics method to estimate SOC, and the error is considered less than 10.6%. The SOC storage change over this 20 year period was calculated using the formula

$$\Delta SOC = \sum_{c,s} (SOC_{REFc,s} \times F_{IMPACTc,s} \times A_{c,s})$$

where  $\Delta SOC$  represents change of SOC stocks;  $SOC_{REF}$  represents SOC density with ground-based soil inventories data taken from soil profiles collected during the 2<sup>nd</sup> National Soil Carbon Survey.  $F_{IMPACT}$  represents the impact factors of SOC change (23) (see details in table S5);  $c$  represents the climate zones;  $s$  represents the soil types; and  $A$  represents land area of the stratum for which carbon stocks are being estimated. For analytical purposes all land in a given stratum should have common biophysical conditions (i.e. climate and soil type).

## Calculation of carbon stock change from forestland management

Based on the 5<sup>th</sup> and 7<sup>th</sup> National Forest Inventory data (1994–1998 and 2004–2008), this study estimates carbon emissions due to forest consumption between 1994 and 2008. In this context forest consumption includes direct forest harvesting, fuel wood collection, forest fires and disaster losses (57). However, living stock volume consumption in the National Forest Inventory included wood harvesting from deforestation, which was also estimated in the land-use change analysis. Therefore, it was necessary to remove this volume consumption to avoid double counting. Here we calculate emissions due to forestland management as a function of consumption biomass volume, consumption rate, stem volume density (*SVD*) and biomass expansion factor (*BEF*), using the formula

$$\Delta C = (V \times CR - A_T \times D_V) \times SVD \times BEF \times 0.5$$

where  $\Delta C$  represents the carbon loss from forest consumption;  $V$  represents living wood growing stock volume;  $CR$  represents forest consumption rate;  $A_T$  represents deforestation area, namely the land changed from forestland to other land-use type;  $D_V$  represents the living stock volume per hectare;  $SVD$  represents average stem volume density in a specific province;  $BEF$  represents biomass expansion factor, defined as the average ratio of all stand biomass to growing stock volume; 0.5 is the default value of carbon content in biomass. The specific parameters for each province or region are listed in tables S3 and S9.

## Calculation of carbon stock change from farmland and grassland management

The carbon stock changes due to farmland and grassland managements were assessed using the empirical model recommend by IPCC (58). In this assessment, relative storage change factors for different management activities on farmland and grassland were taken from the literature (27, 62), and SOC values were taken from the 2<sup>nd</sup> National Soil Survey. The carbon stock change was calculated using the formula

$$\Delta SOC = \sum_c (SOC_{REF_c} \times F_{LU_c} \times F_{MG_c} \times F_{I_c} \times A_c)$$

where  $\Delta SOC$  represents change of SOC stocks;  $SOC_{REF}$  represents SOC density which were derived from thousands of soil profiles collected during 2<sup>nd</sup> National Soil Carbon Survey;  $F_{LU}$  represents the impact factors of land-use;  $F_{MG}$  represents the impact factors of land management;  $F_I$  represents the impact factors of nutrient inputs;  $c$  represents the climate zones;  $A$  represents land area of the stratum being estimated with, as described above, all land in a given stratum having common biophysical conditions (i.e. climate and soil type). The specific impact factor values for farmland and grassland management are listed in tables S5 and S6.

## Supplementary Tables

**table S1. Land-use categories. (28, 37, 59)**

| Top-lever categories | Sub-categories                                                                                                                                                  |
|----------------------|-----------------------------------------------------------------------------------------------------------------------------------------------------------------|
| 1 Farmland           | 11 paddy field<br>12 dry farmland                                                                                                                               |
| 2 Forestland         | 21 wood land<br>22 shrubbery land<br>23 sparsely forested woodland<br>24 other forest land                                                                      |
| 3 Grassland          | 31 high coverage grassland<br>32 middle coverage grassland<br>33 low coverage grassland                                                                         |
| 4 Water              | 41 river and canal<br>42 lake<br>43 reservoir and waterhole<br>44 glacier and firm<br>45 tidal marsh                                                            |
| 5 Built-up land      | 46 shoal and reed land<br>51 cities and towns<br>52 rural settlements                                                                                           |
| 6 Other land         | 53 industry and traffic land<br>61 sandy land<br>62 gobi<br>63 saline-alkali land<br>64 swampland<br>65 bare land<br>66 rock and gravel<br>67 other unused land |

**table S2. Biomass and SOC change due to land-use category change in China between 1990 and 2010.**

| Region          | Biomass carbon stock |               | SOC stock      |               |
|-----------------|----------------------|---------------|----------------|---------------|
|                 | From 1990-2010       | Annual Change | From 1990-2010 | Annual Change |
|                 | TgC, 20a             | TgC           | TgC, 20a       | TgC, a        |
| North China     | 69.8                 | 3.49          | -0.3           | -0.02         |
| Northeast China | -28.1                | -1.41         | -98.6          | -4.93         |
| East China      | -8.3                 | -0.42         | -9.7           | -0.48         |
| Mid-south China | 181.2                | 9.06          | 25.4           | 1.27          |
| Southwest China | 107.9                | 5.40          | -69.7          | -3.48         |
| Northwest China | -58.1                | -2.90         | -77.1          | -3.86         |
| Total           | 264.3                | 13.22         | -230.0         | -11.50        |

**table S3. Repeated calculation for part of forest consumption.**

| Region          | Land transfer out from forest<br>km <sup>2</sup> | Stocking volume<br>m <sup>3</sup> ha <sup>-1</sup> | SVD<br>t m <sup>-3</sup> | BEF   |
|-----------------|--------------------------------------------------|----------------------------------------------------|--------------------------|-------|
| North China     | 30405                                            | 26.83                                              | 0.501                    | 1.375 |
| Northeast China | 40255                                            | 73.43                                              | 0.501                    | 1.402 |
| East China      | 41573                                            | 36.21                                              | 0.423                    | 1.428 |
| Mid-south China | 56893                                            | 27.61                                              | 0.443                    | 1.443 |
| Southwest China | 46470                                            | 72.56                                              | 0.447                    | 1.452 |
| Northwest China | 84011                                            | 27.68                                              | 0.471                    | 1.440 |

Calculated from Table S5.

**table S4. SOC impact factors for change in land-use conversion. (62)**

| Items       | Forest land      | Grassland | Farmland |
|-------------|------------------|-----------|----------|
| Forest land |                  | -10%      | -27%     |
| Grassland   | Tropical 80%     |           | -20%     |
|             | Sub-tropical 90% |           |          |
|             | Temperate 100%   |           |          |
| Farmland    | Tropical 80%     | 100%      |          |
|             | Temperate 90%    |           |          |

**table S5. SOC impact factors for Chinese farmland management. (27)**

| Factor                      | Level                       | Moisture regime | Cold temperate | Warm temperate | Tropical |
|-----------------------------|-----------------------------|-----------------|----------------|----------------|----------|
|                             |                             |                 | 0<MAT<10       | 10<MAT<18      | MAT>18   |
| Land-use (F <sub>LU</sub> ) | long term cultivated        | Dry             | 0.80           | 0.80           | 0.58     |
|                             |                             | Wet             | 0.69           | 0.69           | 0.48     |
| Tillage (F <sub>MG</sub> )  | full                        | Dry             | 1.00           | 1.00           | 1.00     |
|                             |                             | Wet             | 1.00           | 1.00           | 1.00     |
|                             | No-till                     | Dry             | 1.10           | 1.10           | 1.17     |
|                             |                             | Wet             | 1.15           | 1.15           | 1.22     |
|                             | fertilizer                  | Dry             | 0.95           | 0.95           | 0.95     |
|                             |                             | Wet             | 0.92           | 0.92           | 0.92     |
| Input (F <sub>I</sub> )     | Organic fertilizer          | Dry             | 1.00           | 1.00           | 1.00     |
|                             |                             | Wet             | 1.00           | 1.00           | 1.00     |
|                             | Straw returning with manure | Dry             | 1.04           | 1.04           | 1.04     |
|                             |                             | Wet             | 1.11           | 1.11           | 1.11     |

**table S6. SOC impact factors for Chinese grassland management. (62)**

| Factor                                                | Level                         | Climate regime    | GPG revised default |
|-------------------------------------------------------|-------------------------------|-------------------|---------------------|
| Land-use (F <sub>LU</sub> )                           | all                           | all               | 1.00                |
|                                                       | nominally managed             | all               | 1.00                |
|                                                       | moderately degraded grassland | temperate/ boreal | 0.95                |
| Management (F <sub>MG</sub> )                         | severely degraded             | tropical          | 0.97                |
|                                                       |                               | all               | 0.70                |
|                                                       | improved grassland            | temperate/ boreal | 1.14                |
| Input (F <sub>I</sub> ) applied to improved grassland | nominal                       | tropical          | 1.17                |
|                                                       |                               | all               | 1.00                |
|                                                       | high                          | temperate/ boreal | 1.11                |
|                                                       |                               | tropical          | 1.11                |

**table S7. Biomass carbon density of Chinese vegetation types.**

| Vegetation types                                                                             | Carbon Density<br>(tC ha <sup>-1</sup> ) | References |
|----------------------------------------------------------------------------------------------|------------------------------------------|------------|
| Boreal, temperate mountain deciduous coniferous forests                                      | 52.3                                     | (31)       |
| Temperate mountain evergreen coniferous forest                                               | 86.7                                     | (31)       |
| Temperate steppe sandy evergreen coniferous woodland                                         | 46.4                                     | (31)       |
| Temperate evergreen coniferous forest                                                        | 22.4                                     | (31)       |
| Subtropical and tropical evergreen coniferous forest                                         | 17.4                                     | (31)       |
| Subtropical and tropical mountain evergreen coniferous forest                                | 26.8                                     | (31)       |
| Temperate deciduous broadleaf - evergreen conifer mixed forest                               | 48.0                                     | (31)       |
| Temperate, subtropical deciduous broadleaf forest                                            | 43.2                                     | (31)       |
| Temperate, subtropical deciduous microphylla forest                                          | 28.8                                     | (31)       |
| Temperate deciduous microphylla woodland                                                     | 34.6                                     | (31)       |
| Sub-tropical limestone deciduous - evergreen broadleaf mixed forest                          | 32.0                                     | (31)       |
| Subtropical mountain yellow-soil evergreen - deciduous broadleaf mixed forest                | 69.1                                     | (31)       |
| Subtropical evergreen broadleaf forest                                                       | 59.2                                     | (31)       |
| Tropical rain forest of evergreen broadleaf forest                                           | 68.2                                     | (31)       |
| Subtropical evergreen sclerophyllous broadleaf forest                                        | 58.8                                     | (31)       |
| Subtropical Bamboo                                                                           | 34.4                                     | (63)       |
| Tropical semi-evergreen broadleaf forests and secondary vegetation                           | 68.2                                     | (31)       |
| Tropical evergreen broadleaf forests and secondary vegetation                                | 68.2                                     | (31)       |
| Temperate, subtropical deciduous shrub, coppice                                              | 6.2                                      | (64)       |
| Subtropical and tropical acid soil evergreen, deciduous broadleaf shrubs, coppice and meadow | 17.0                                     | (64)       |
| Subtropical and tropical limestone evergreen, deciduous shrubs, coppice                      | 12.1                                     | (64)       |
| Tropical evergreen broadleaf sclerophyllous coastal scrub, coppice                           | 5.9                                      | (64)       |
| Tropical evergreen broadleaf shrub succulent coral reefs, coppice                            | 5.9                                      | (64)       |
| Sub-tropical mountains, sub-alpine evergreen scoriaceous scrub, coppice                      | 11.7                                     | (64)       |
| Temperate, subtropical sub-alpine deciduous scrub                                            | 7.7                                      | (64)       |
| Temperate alpine dwarf shrub tundra                                                          | 3.3                                      | (65)       |
| Temperate, subtropical subalpine cushion-shaped dwarf shrubs, herbaceous vegetation          | 3.3                                      | (65)       |
| Temperate dwarf semi-shrubby desert                                                          | 1.0                                      | (65)       |
| Temperate succulent holophytic dwarf semi-shrubby desert                                     | 1.0                                      | (65)       |
| Temperate shrubby and semi-shrubby desert                                                    | 1.0                                      | (65)       |
| Temperate semi - arboreous desert                                                            | 1.0                                      | (65)       |
| Temperate prostrate dwarf semi-shrubby desert                                                | 1.2                                      | (65)       |
| Temperate grass and forb steppe                                                              | 2.1                                      | (66)       |
| Temperate needlegrass steppe                                                                 | 2.1                                      | (66)       |
| Temperate mountain needlegrass steppe                                                        | 2.1                                      | (66)       |
| Temperate dwarf needlegrass, semi-dwarf shrub steppe                                         | 2.1                                      | (66)       |
| Temperate mountain dwarf grass, semi-dwarf shrub steppe                                      | 2.1                                      | (66)       |
| Temperate, subtropical alpine steppe                                                         | 1.8                                      | (65)       |
| Subtropical and tropical shrub savanna                                                       | 3.4                                      | (29)       |
| Temperate meadow                                                                             | 3.7                                      | (65)       |
| Temperate and sub-tropical alpine meadow                                                     | 1.8                                      | (65)       |
| Temperate herbaceous swamp                                                                   | 3.9                                      | (65)       |
| Temperate alpine herbaceous swamp                                                            | 3.9                                      | (65)       |
| Cold-temperate cultivated vegetation                                                         | 5.7                                      | (29)       |
| Dry-Temperate cultivated vegetation                                                          | 5.7                                      | (29)       |
| Humid-temperate cultivated vegetation                                                        | 5.7                                      | (29)       |
| Sub-Tropical cultivated vegetation                                                           | 5.7                                      | (29)       |
| Tropical cultivated vegetation                                                               | 5.7                                      | (29)       |
| Bare land/Ice/desert                                                                         | 0.0                                      | (29)       |
| Lake                                                                                         | 0.0                                      | (29)       |

**table S8. SOC density of Chinese soil types. (54)**

| Soil type                    | SOC density (tC ha <sup>-1</sup> ) | Soil type                | SOC density (tC ha <sup>-1</sup> ) |
|------------------------------|------------------------------------|--------------------------|------------------------------------|
| Laterite                     | 9.23                               | Limestone soil           | 13.05                              |
| Crimson soil                 | 9.15                               | Volcanic ash soils       | 13.76                              |
| Red soil                     | 9.58                               | Purple soil              | 5.54                               |
| Yellow soil                  | 10.51                              | Rocky soil               | 1.62                               |
| brown coniferous forest soil | 24.74                              | Skeleton soil            | 5.15                               |
| Grev soil                    | 94.29                              | Meadow soil              | 14.43                              |
| Yellow brown soil            | 13.12                              | Shajiang black soil      | 7.07                               |
| Yellow cinnamon soil         | 6.7                                | Mountain meadow soil     | 26.91                              |
| Brown soil                   | 12.81                              | Forest/shrub meadow soil | 6.63                               |
| Dark brown soil              | 18.76                              | Tidal soil               | 6.54                               |
| Bleached beijiang soils      | 14                                 | Bog soils                | 49.49                              |
| Dark red soil                | 9.2                                | Pearl soil               | 146.76                             |
| Cinnamon soil                | 8.25                               | Solonchak soil           | 6.36                               |
| Grey cinnamon soil           | 13.38                              | Desert solonchak soil    | 5.49                               |
| Black soil                   | 15.42                              | Seashore solonchak soil  | 10.92                              |
| Grey forest soil             | 29.38                              | Acid sulphate soil       | 27.29                              |
| Chernozem                    | 16.12                              | Frigid solonchak soil    | 4.15                               |
| Chestnut-like calcic soil    | 11.06                              | Alkali soil              | 5.33                               |
| Chestnut-like cinnamon soil  | 5.61                               | Paddy soil               | 11.14                              |
| Dark calcic soil             | 8.61                               | Irrigated alluvial soil  | 7.21                               |
| Calcic brown soil            | 4.25                               | Irrigated desert soil    | 9.52                               |
| Sierozem                     | 5.28                               | Grass felt soil          | 14.79                              |
| Grev desert soil             | 3.6                                | Black grass felt soil    | 18.05                              |
| Grey brown desert soil       | 1.53                               | Cold calcic soil         | 6.08                               |
| Brown desert soil            | 1.15                               | Cool calcic soil         | 6.2                                |
| Yellow soft soil             | 3.98                               | Brown cool calcic soil   | 6.42                               |
| Red clay soil                | 5.3                                | Cold desert soil         | 3.56                               |
| Recent deposited soil        | 4.67                               | Cool desert soil         | 1.21                               |
| Takyr soil                   | 3.21                               | Cold frozen soil         | 2.64                               |
| Wind sand soil               | 1.91                               |                          |                                    |

**table S9. Parameters for Chinese forest consumption.**

| Province       | 7 <sup>th</sup> forest inventory (2004-2008) (67)   |                         |                             |       | 5 <sup>th</sup> forest inventory (1994-1998) (57)   |                         |                             |      |
|----------------|-----------------------------------------------------|-------------------------|-----------------------------|-------|-----------------------------------------------------|-------------------------|-----------------------------|------|
|                | Biomass volume<br>(10 <sup>4</sup> m <sup>3</sup> ) | Consumption<br>Rate (%) | SVD<br>(t m <sup>-3</sup> ) | BEF   | Biomass volume<br>(10 <sup>4</sup> m <sup>3</sup> ) | Consumption<br>Rate (%) | SVD<br>(t m <sup>-3</sup> ) | BEF  |
| Beijing        | 1291.29                                             | 4.31                    | 0.484                       | 1.427 | 1115.25                                             | 3.28                    | 0.504                       | 1.58 |
| Tianjin        | 277.01                                              | 9.44                    | 0.423                       | 1.470 | 250.46                                              | 4.49                    | 0.507                       | 1.69 |
| Hebei          | 10183.91                                            | 4.89                    | 0.478                       | 1.430 | 7856.82                                             | 8.22                    | 0.504                       | 1.53 |
| Shanxi         | 8846.96                                             | 2.21                    | 0.484                       | 1.467 | 8009.04                                             | 6.73                    | 0.484                       | 1.59 |
| Inner Mongolia | 136073.6                                            | 0.88                    | 0.505                       | 1.364 | 116859.43                                           | 1.47                    | 0.486                       | 1.45 |
| Liaoning       | 21174.91                                            | 3.23                    | 0.504                       | 1.434 | 17362.63                                            | 1.73                    | 0.518                       | 1.59 |
| Jilin          | 88244.21                                            | 1.91                    | 0.505                       | 1.411 | 82753.39                                            | 3.80                    | 0.508                       | 1.55 |
| Heilongjiang   | 165191.6                                            | 1.67                    | 0.499                       | 1.393 | 156615.58                                           | 2.02                    | 0.507                       | 1.50 |
| Shanghai       | 275.2                                               | 6.71                    | 0.392                       | 1.461 | 133.67                                              | 2.86                    | 0.516                       | 1.49 |
| Jiangsu        | 5022.59                                             | 10.16                   | 0.395                       | 1.309 | 3633.57                                             | 14.40                   | 0.278                       | 1.55 |
| Zhejiang       | 19382.93                                            | 4.46                    | 0.406                       | 1.421 | 12660.40                                            | 15.27                   | 0.436                       | 1.52 |
| Anhui          | 16258.35                                            | 6.14                    | 0.416                       | 1.408 | 10441.14                                            | 5.71                    | 0.436                       | 1.62 |
| Fujian         | 53226.01                                            | 5.63                    | 0.436                       | 1.441 | 41763.62                                            | 8.67                    | 0.454                       | 1.57 |
| Jiangxi        | 45045.51                                            | 5.35                    | 0.422                       | 1.435 | 27695.69                                            | 6.94                    | 0.461                       | 1.53 |
| Shandong       | 8627.99                                             | 9.51                    | 0.412                       | 1.428 | 6022.19                                             | 6.81                    | 0.482                       | 1.68 |
| Henan          | 18051.16                                            | 6.86                    | 0.488                       | 1.392 | 13167.55                                            | 9.90                    | 0.563                       | 1.59 |
| Hubei          | 23121.55                                            | 4.94                    | 0.459                       | 1.477 | 14759.04                                            | 8.04                    | 0.480                       | 1.51 |
| Hunan          | 38177.2                                             | 6.38                    | 0.394                       | 1.387 | 23147.09                                            | 7.93                    | 0.429                       | 1.51 |
| Guangdong      | 32160.74                                            | 7.18                    | 0.474                       | 1.513 | 21325.15                                            | 9.06                    | 0.464                       | 1.57 |
| Guangxi        | 51056.78                                            | 5.90                    | 0.430                       | 1.448 | 31027.39                                            | 6.66                    | 0.471                       | 1.47 |
| Hainan         | 7940.93                                             | 4.07                    | 0.488                       | 1.419 | 7281.49                                             | 4.20                    | 0.495                       | 1.58 |
| Chongqing      | 13803.63                                            | 2.93                    | 0.431                       | 1.419 | -                                                   | -                       | -                           | -    |
| Sichuan        | 168753.5                                            | 1.06                    | 0.425                       | 1.419 | 154520.65                                           | 1.82                    | 0.453                       | 1.63 |
| Guizhou        | 27911.53                                            | 3.70                    | 0.425                       | 1.480 | 17022.35                                            | 5.99                    | 0.477                       | 1.57 |
| Yunnan         | 171216.7                                            | 2.25                    | 0.501                       | 1.488 | 142391.06                                           | 3.17                    | 0.531                       | 1.61 |
| Tibet          | 227271.4                                            | 0.47                    | 0.427                       | 1.449 | 209063.72                                           | 0.42                    | 0.376                       | 1.70 |
| Shaanxi        | 36144.16                                            | 2.28                    | 0.558                       | 1.517 | 33407.95                                            | 2.98                    | 0.555                       | 1.62 |
| Gansu          | 21708.26                                            | 1.89                    | 0.462                       | 1.433 | 19224.52                                            | 3.34                    | 0.495                       | 1.65 |
| Qinghai        | 4413.8                                              | 1.27                    | 0.408                       | 1.483 | 3728.46                                             | 1.24                    | 0.425                       | 1.67 |
| Ningxia        | 625.93                                              | 3.30                    | 0.444                       | 1.445 | 674.17                                              | 14.78                   | 0.432                       | 1.59 |
| Xinjiang       | 33914.5                                             | 1.55                    | 0.393                       | 1.356 | 28998.52                                            | 1.04                    | 0.393                       | 1.60 |

During the 5<sup>th</sup> Forest Inventory, Chongqing was still part of Sichuan Province.
